# Supplementary material for: Infection profile of immune-modulatory drugs used in autoimmune diseases: analysis of summary of product characteristic data
Source: HighWire-hosted journal article supplement (doi:10.1136/rmdopen-2022-002621), 2022-11-01
Supplement: rmdopen-2022-002621supp001_data_supplement.pdf [file rmdopen-2022-002621supp001_data_supplement.pdf]

| Drug & pathogen type         |                                  | BACTERIA | FUNGI | PARASITES | PROTOZOA | VIRUSES |
|------------------------------|----------------------------------|----------|-------|-----------|----------|---------|
| Conventional synthetic drugs | Azathioprine                     | ●        | ●     |           |          | ●       |
|                              | Cladribine                       |          |       |           |          | ●       |
|                              | Mycophenolate mofetil            |          | ●     |           |          | ●       |
|                              | Teriflunomide                    |          |       |           |          | ●       |
| Targeted synthetic drugs     | Janus kinase                     |          |       |           |          | ●       |
|                              | Baricitinib                      |          |       |           |          | ●       |
|                              | Filgotinib                       |          |       |           |          | ●       |
|                              | Tofacitinib                      |          |       |           |          | ●       |
|                              | Upadacitinib                     |          |       |           |          | ●       |
|                              | Sphingosine 1-phosphate receptor |          |       |           |          | ●       |
| Biologic drugs               | TNFα                             | ●        | ●     |           |          | ●       |
|                              | Adalimumab                       | ●        | ●     |           |          | ●       |
|                              | Certolizumab                     | ●        | ●     |           |          | ●       |
|                              | Etanercept                       | ●        | ●     |           | ●        | ●       |
|                              | Golimumab                        | ●        | ●     |           | ●        | ●       |
|                              | Infliximab                       | ●        | ●     | ●         |          | ●       |
|                              | IL-6                             |          |       |           |          | ●       |
|                              | Tocilizumab                      |          |       |           |          | ●       |
|                              | IL-17                            |          |       |           |          | ●       |
|                              | Ixekizumab                       |          |       |           |          | ●       |
|                              | Secukinumab                      |          | ●     |           |          | ●       |
|                              | IL-12/23                         |          |       |           |          | ●       |
|                              | Ustekinumab                      |          |       |           |          | ●       |
|                              | IL-23                            |          |       |           |          | ●       |
|                              | Guselkumab                       |          |       |           |          | ●       |
| Cell-targeted                | Complement C5                    |          | ●     |           |          | ●       |
|                              | Eculizumab                       |          | ●     |           |          | ●       |
|                              | Other cytokine/enzyme target     |          |       |           |          | ●       |
|                              | Canakinumab                      |          |       |           |          | ●       |
|                              | Abatacept                        |          |       |           |          | ●       |
|                              | Alemtuzumab                      | ●        |       |           |          | ●       |
|                              | Belimumab                        | ●        |       |           |          | ●       |
| Cell-targeted                | Ocrelizumab                      |          |       |           |          | ●       |
|                              | Rituximab                        | ●        | ●     |           |          | ●       |
|                              | Vedolizumab                      |          | ●     |           |          | ●       |
